# Supplementary material
Source: PubMed Central journal article supplement (PMC3706173)
Supplement: DS_10.1177_0022034513480802.pdf [file DS_10.1177_0022034513480802.pdf]

# DISCOVERY!

L.D. Wandner<sup>1</sup>, A.T. Hirsh<sup>2</sup>, C.A. Torres<sup>1</sup>,  
B.C. Lok<sup>3</sup>, C.D. Scipio<sup>4</sup>, M.W. Heft<sup>5</sup>,  
and M.E. Robinson<sup>1\*</sup>

<sup>1</sup>Department of Clinical and Health Psychology, University of Florida, Gainesville, FL, USA; <sup>2</sup>Department of Psychology, Indiana University – Purdue University, Indianapolis, IN, USA; <sup>3</sup>Computer and Information Science and Engineering Department, University of Florida, Gainesville, FL, USA; <sup>4</sup>Durham VA Medical Center, Durham, NC, USA; and <sup>5</sup>College of Dentistry, University of Florida, Gainesville, FL, USA; \*corresponding author, merobin@ufl.edu

*J Dent Res* DOI: 10.1177/0022034513480802

## APPENDIX

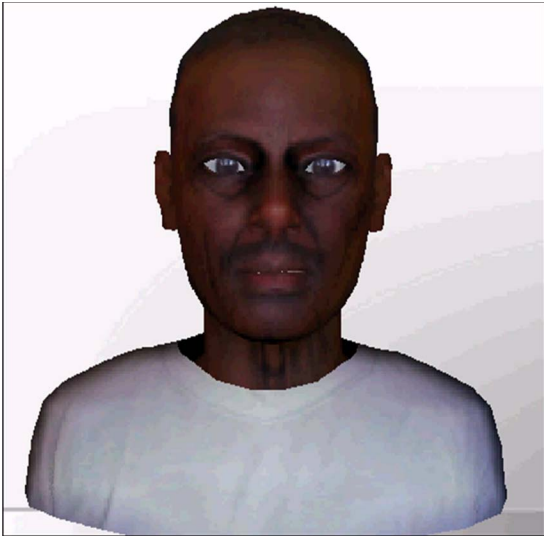

**Appendix Figure 1.** Still frame of virtual human (VH) with cues representing male gender, African-American race, older age, and low pain expression.

# Using Virtual Human Technology to Capture Dentists' Decision Policies about Pain

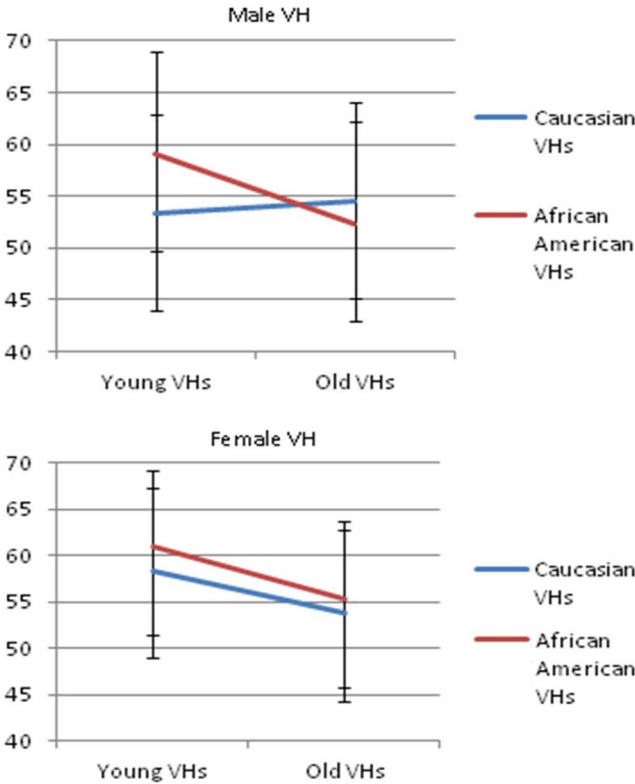

**Appendix Figure 2.** Analysis of the 3-way interaction among virtual human (VH) Race-VH, Gender-VH, and Age for pain assessment.
